# Supplementary material for: Switchable oriented attachment and detachment of calcite nanocrystals
Source: Royal Society of Chemistry journal article supplement (doi:10.1039/c6ce02161a), 2016-01-01
Supplement: c6ce02161a1.pdf [file c6ce02161a1.pdf]

## Supporting information

### Switchable Oriented Attachment and Detachment of Calcite Nanocrystals

Mihiro Takasaki, Yuya Oaki, and Hiroaki Imai\*

Department of Applied Chemistry, Faculty of Science and Technology, Keio University, 3-14-1 Hiyoshi, Kohoku-ku, Yokohama 223-8522, Japan

Email: hiroaki@applc.keio.ac.jp

#### Contents

##### Characterization techniques

We analyzed nanograins that were obtained by drying filtered dispersion with XRD (Rigaku MiniFlex II) and SEM (Hitachi S-4700, operated at 1.0–5.0 kV). We observed the morphological evolution of the nanograins in the dispersion by TEM (FEI Tecnai F20, operated at 200 kV). The dispersion was dropped on a copper grid covered with a collodion film for TEM observation.

##### Additional information and data

Observation and characterization of calcite nanoblocks after carbonation of  $\text{Ca}(\text{OH})_2$  dispersion and elongated calcite nanocrystals formed by oriented attachment of the nanoblocks through the (001) faces in a basic dispersion (Figure S1)

Observation of adjacent calcite nanoblocks arranged in chains in a basic dispersion (Figure S2)

Grain-size distributions of singly dispersed nanocrystals in the initial dispersion after carbonation, and after basification and subsequent neutralization (Figure S3)

### Additional information and data

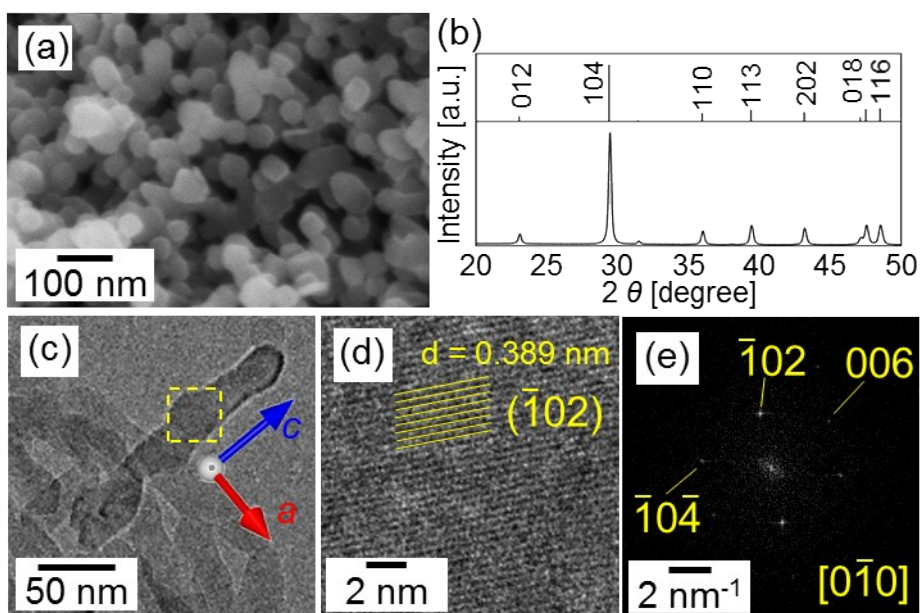

**Fig. S1** A SEM image (a) and a typical XRD pattern (b) of nanocrystals in a dispersion at pH 12 after carbonation; TEM (c) and HRTEM (d) images of elongated nanocrystals in a dispersion maintained at 25°C for 720 h and the FFT pattern (e) of the lattice in the HRTEM image (d). Reproduced from Ref. 17 with permission.

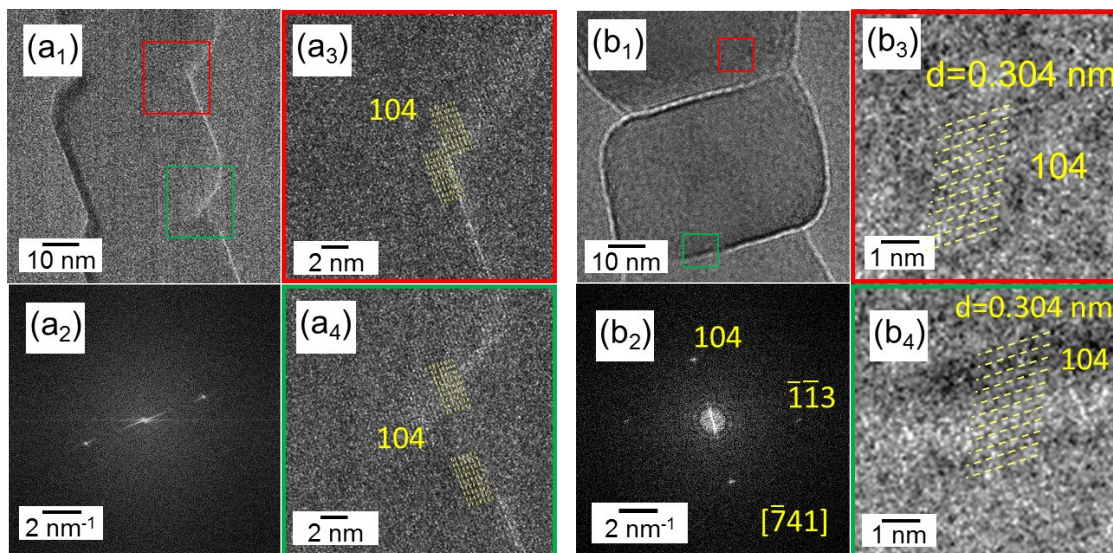

**Fig. S2** HRTEM images (a<sub>1</sub>, 3-4, b<sub>1</sub>, 3-4) and FFT patterns (a<sub>2</sub>, b<sub>2</sub>) of adjacent calcite nanoblocks in chains in a basic dispersion (pH 12) kept for 120 h.

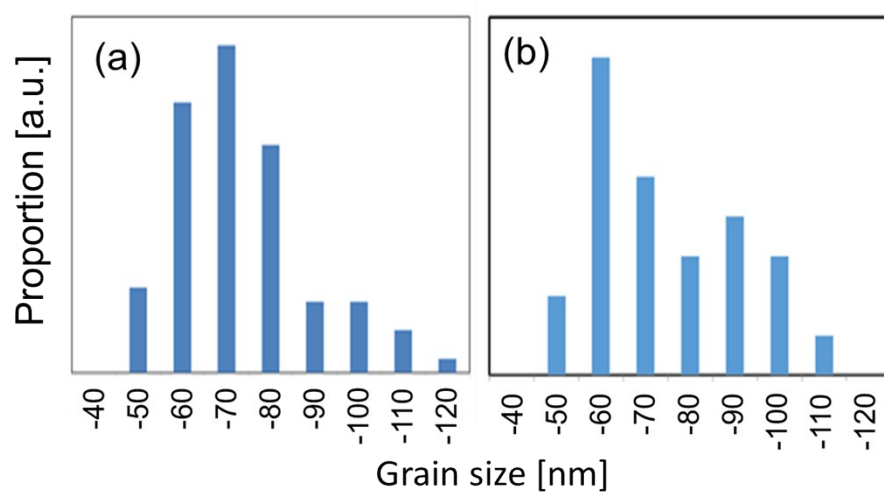

**Fig. S3** Grain-size distributions of nanocrystals in the initial dispersion at pH 7 after carbonation (a) and in a dispersion at pH 7 after basification and subsequent neutralization (b). The size distributions were estimated from 100 grains in TEM images.

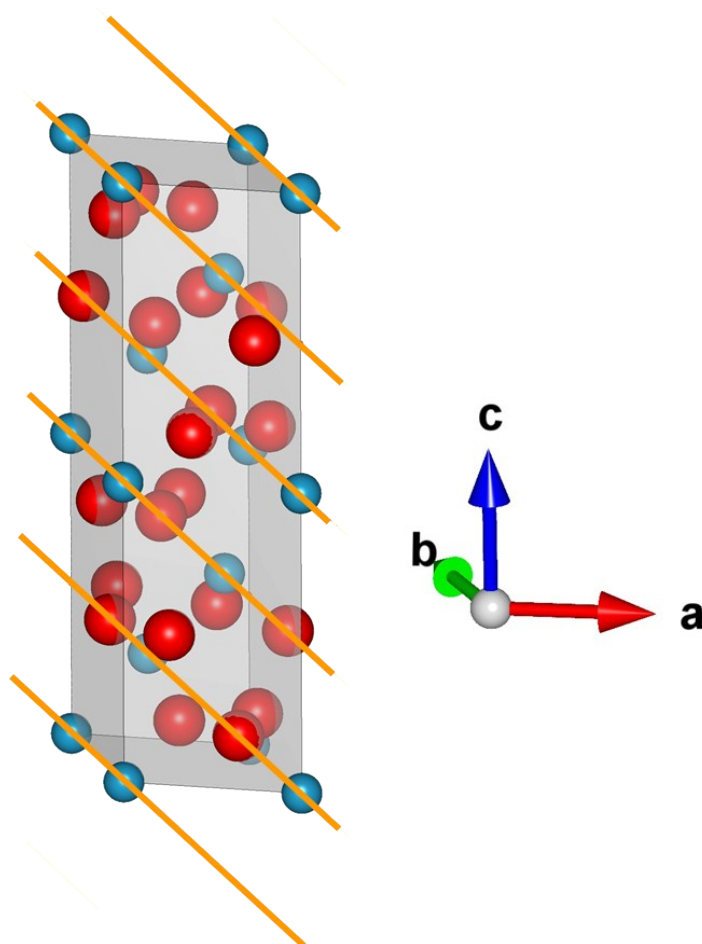

**Fig. S4** Schematic illustration of a calcite ionic configuration with crystal orientation vector. Red and blue spheres are the  $\text{CO}_3^{2-}$  and  $\text{Ca}^{2+}$  ions, respectively. Orange lines indicate the  $\{104\}$  faces of calcite crystal structure.
